# Supplementary material for: Assessment of Meteorological Drought Trends in a Selected Coastal Basin Area in Poland—A Case Study
Source: MDPI journal article supplement (doi:10.3390/w15152836), 2023-08-05
Supplement: s1 [file s1]

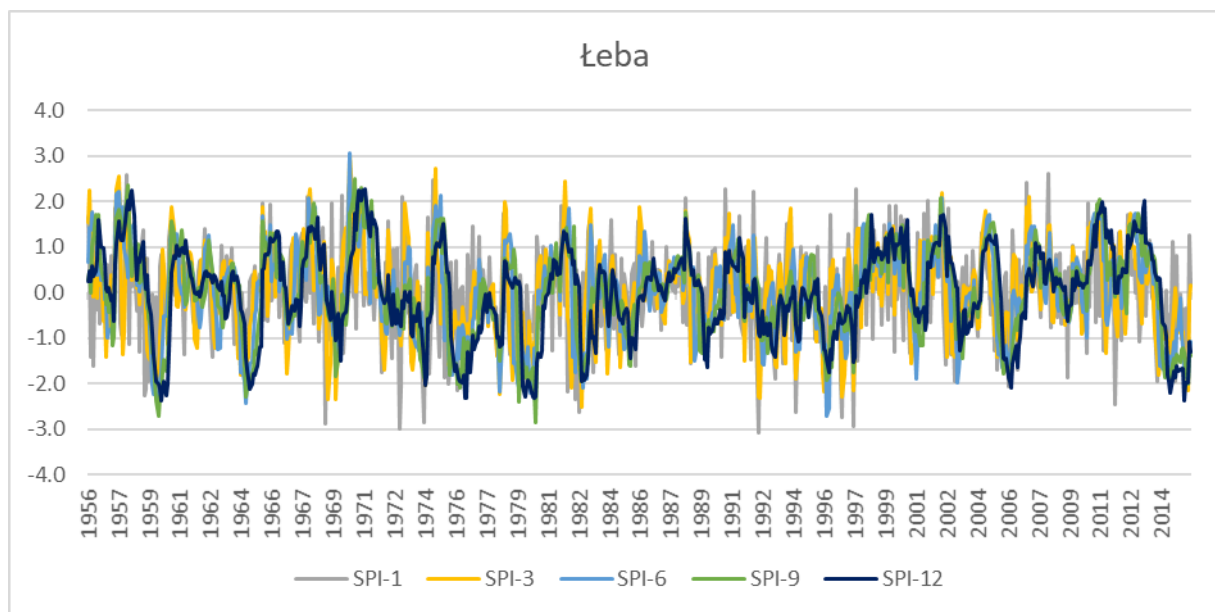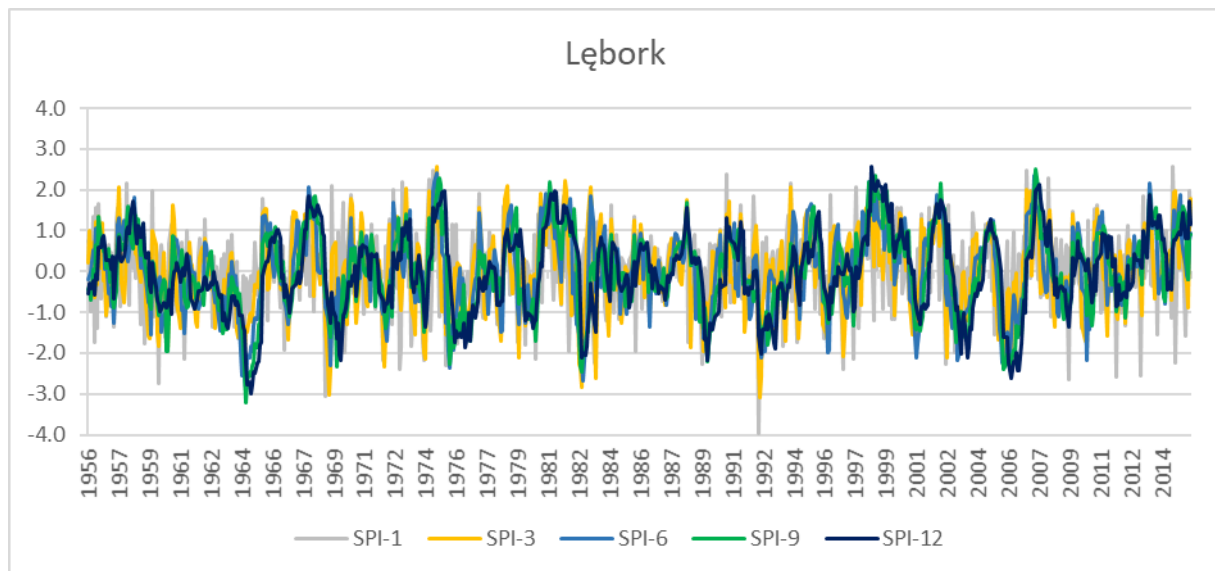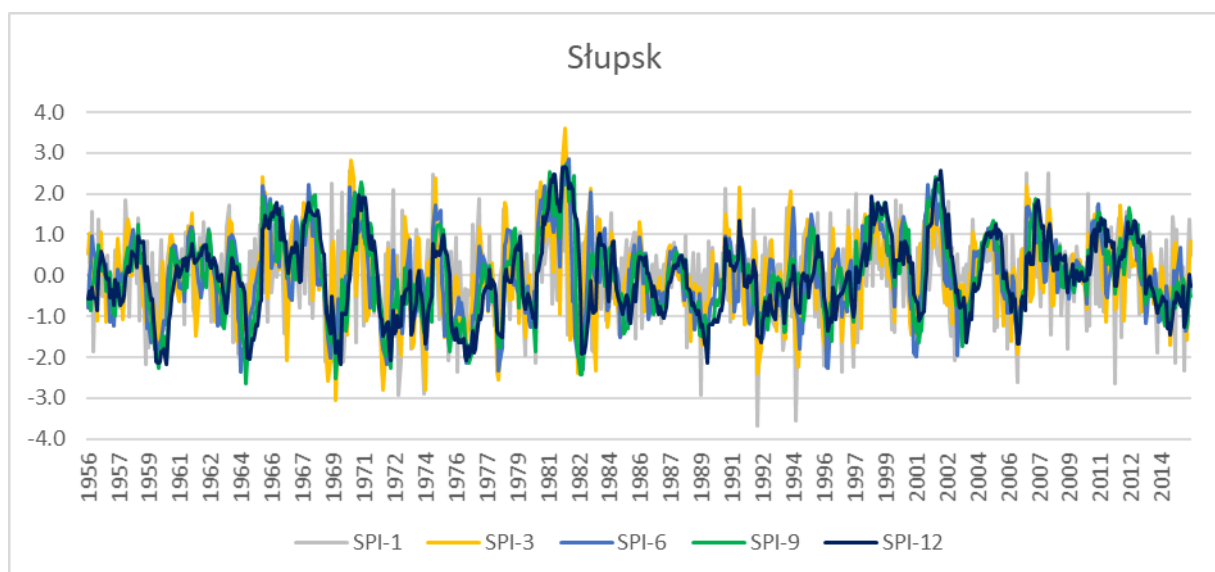

### Kościerzyna

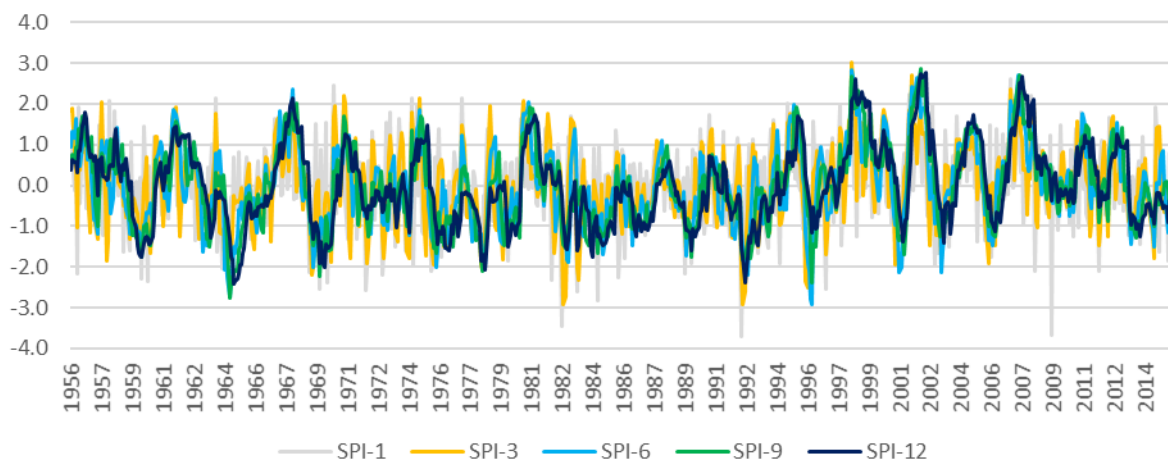

### Żelazno

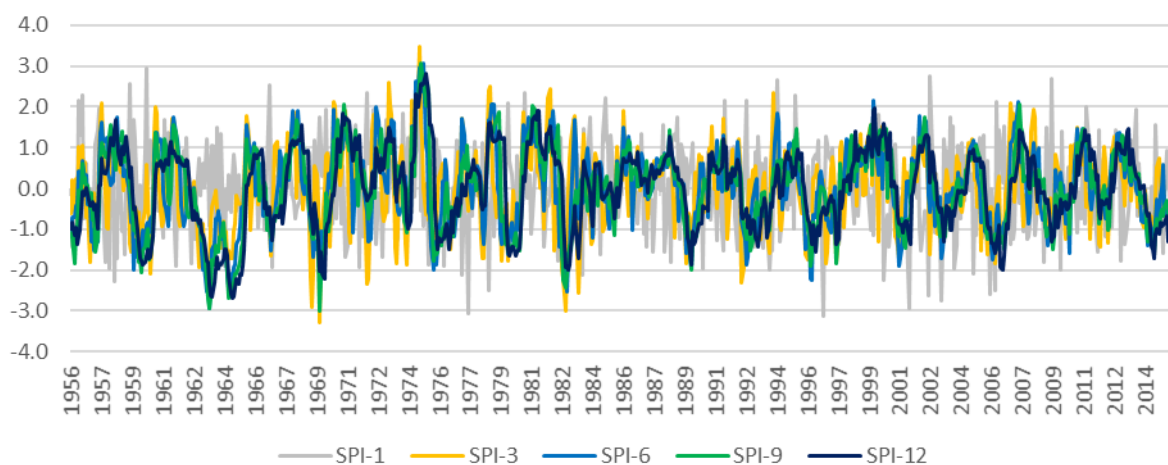

### Wejherowo

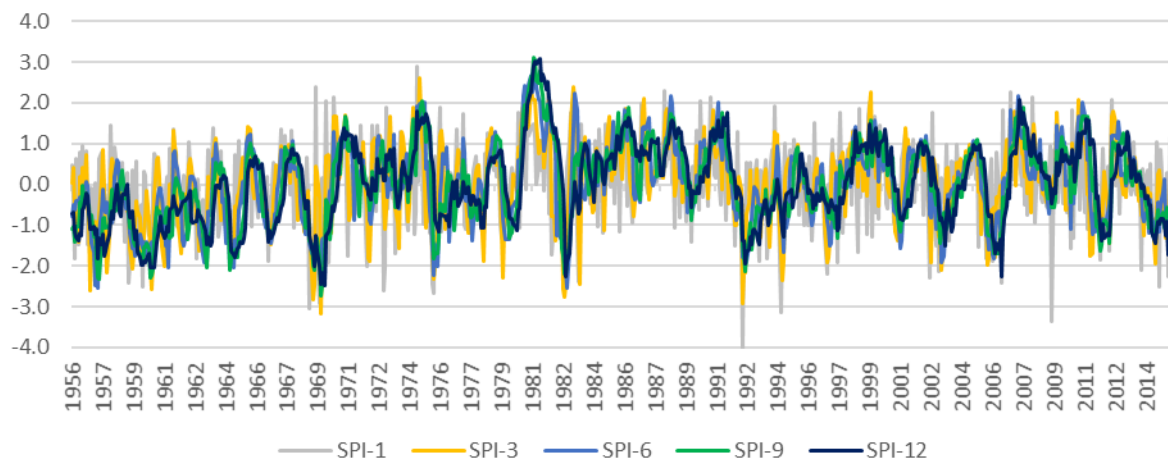

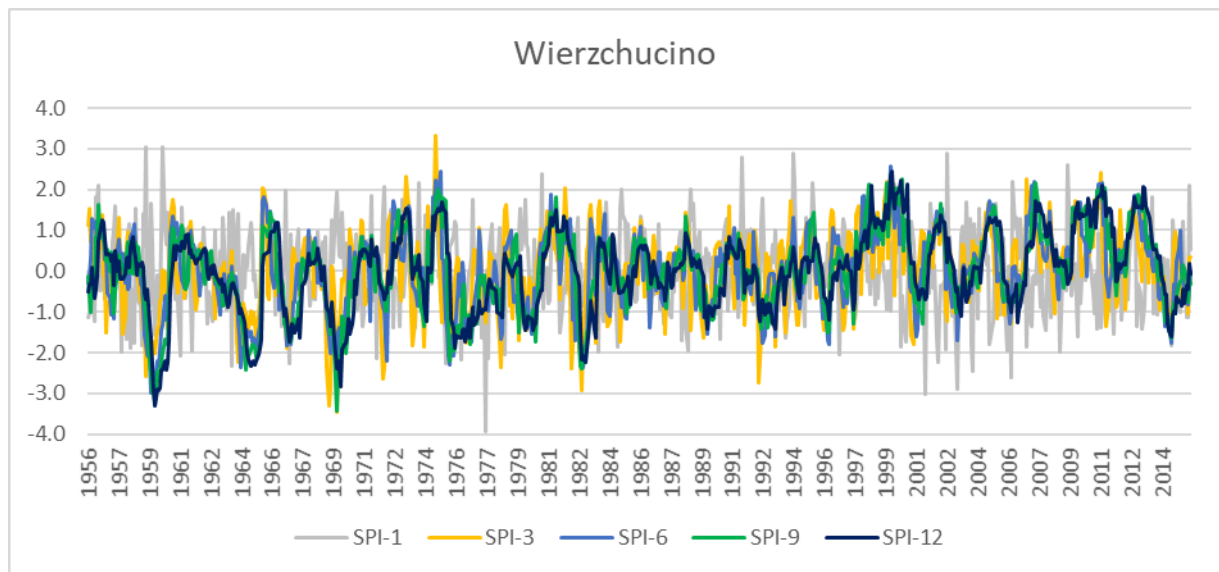

Figure S2. Distribution of monthly SPI values in different time scales in the years 1956-2015
