# Supplementary material for: Assessment of Meteorological Drought Trends in a Selected Coastal Basin Area in Poland—A Case Study
Source: MDPI journal article supplement (doi:10.3390/w15152836), 2023-08-05
Supplement: s1 [file s1]

Archive with 3 entries (3 files):
- Figure S1.pdf
- Figure S2.pdf
- Figure S3.pdf
