# Supplementary figures and images for: Assessment of Meteorological Drought Trends in a Selected Coastal Basin Area in Poland—A Case Study
Source: MDPI journal article supplement (doi:10.3390/w15152836), 2023-08-05

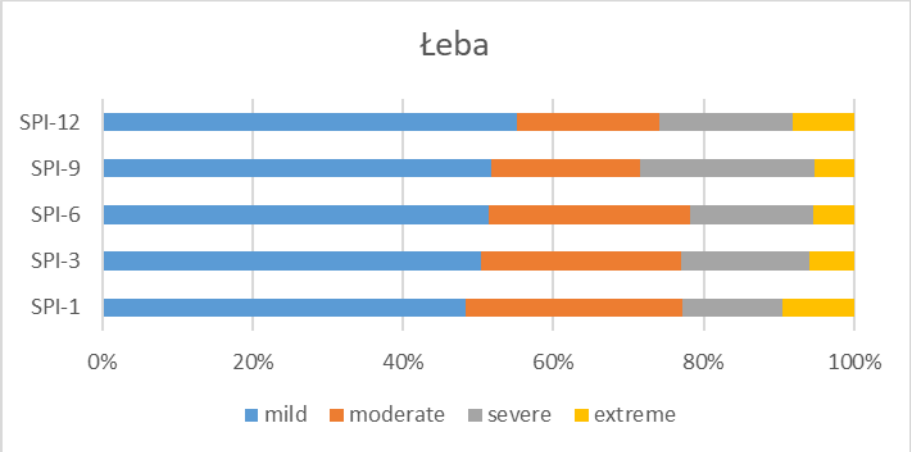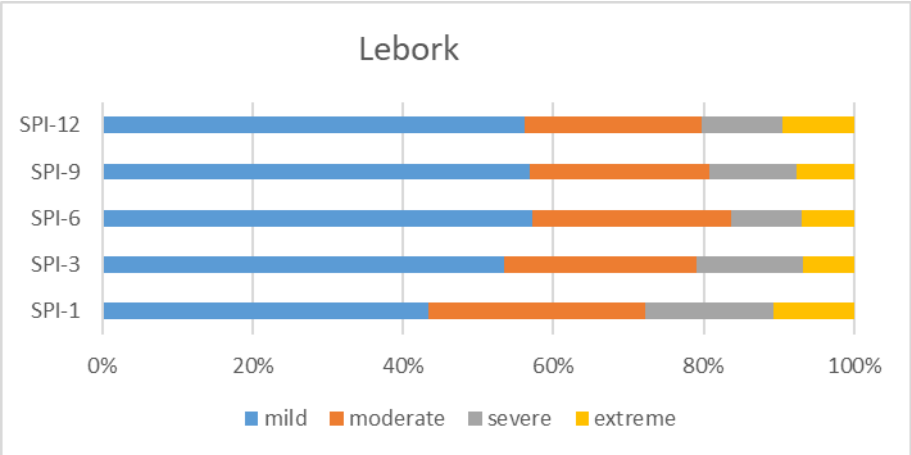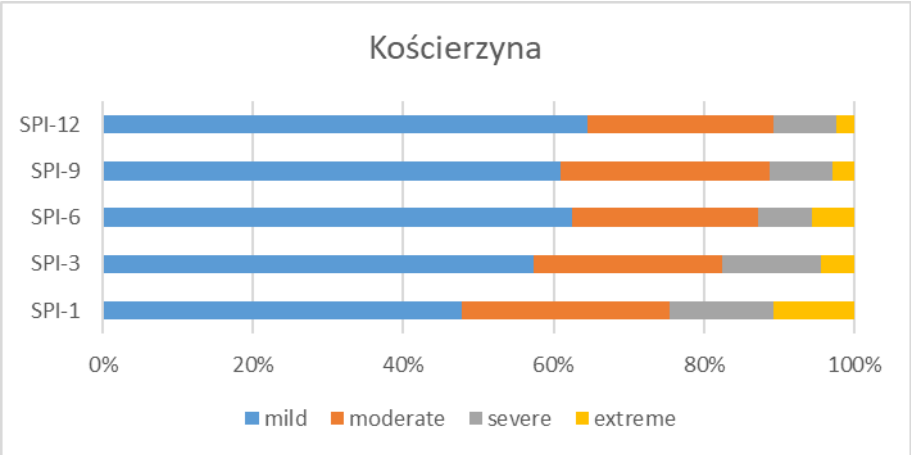

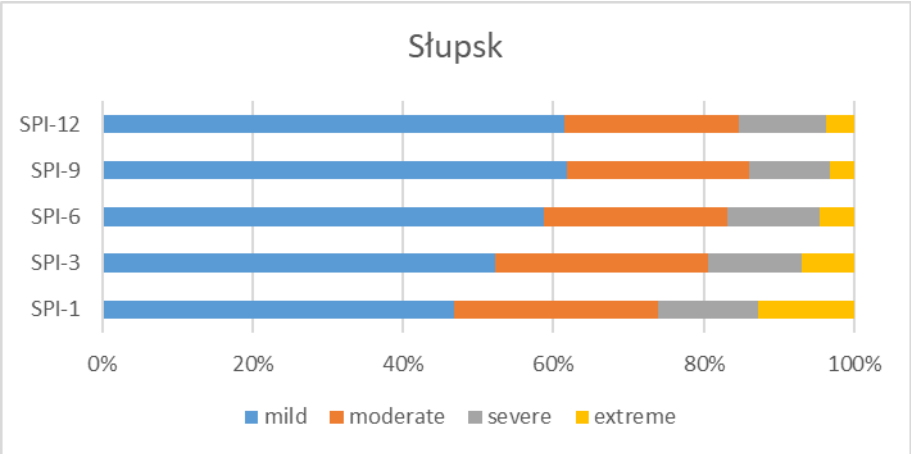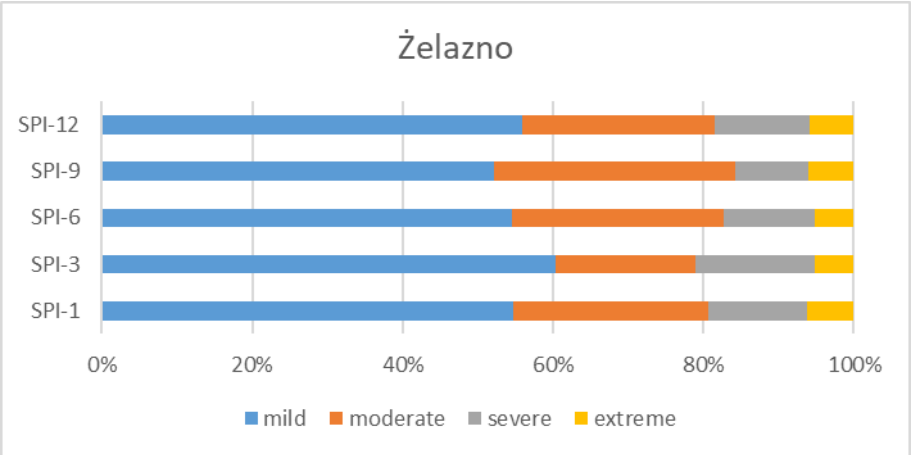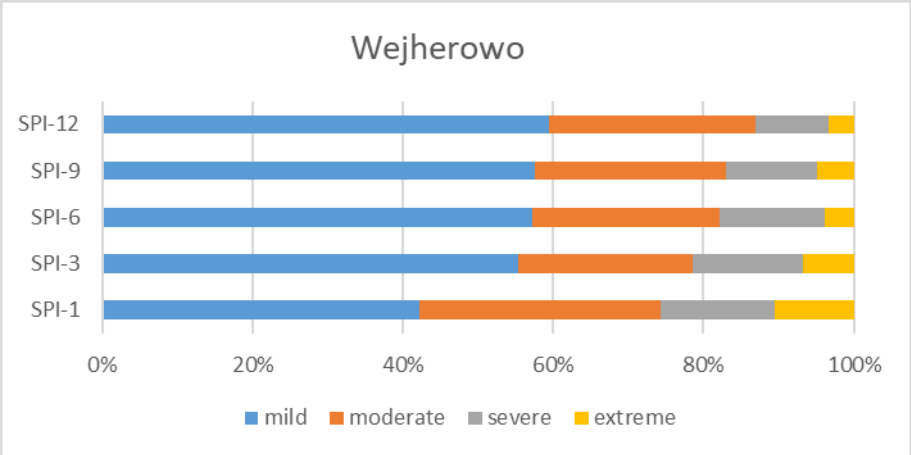

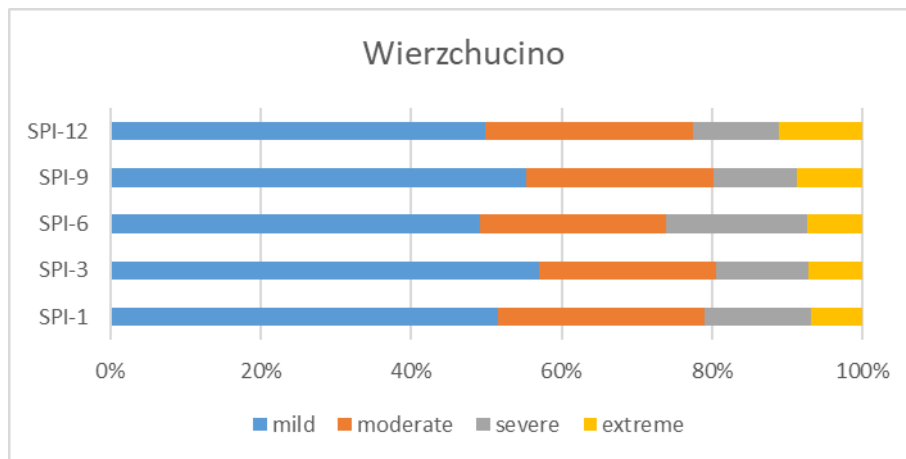

Figure S3. Types of meteorological drought in years 1956-2015

Supplement: s1 [file s1]

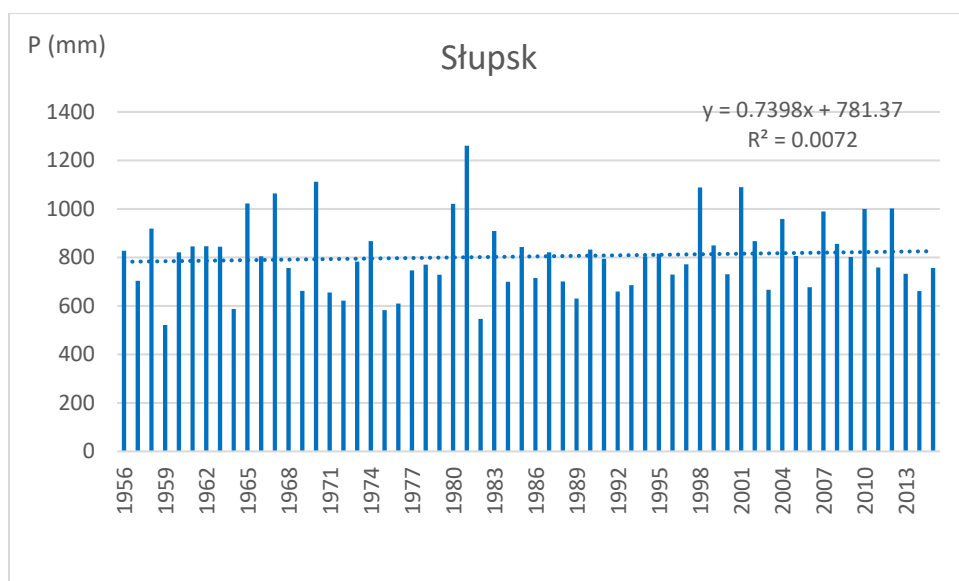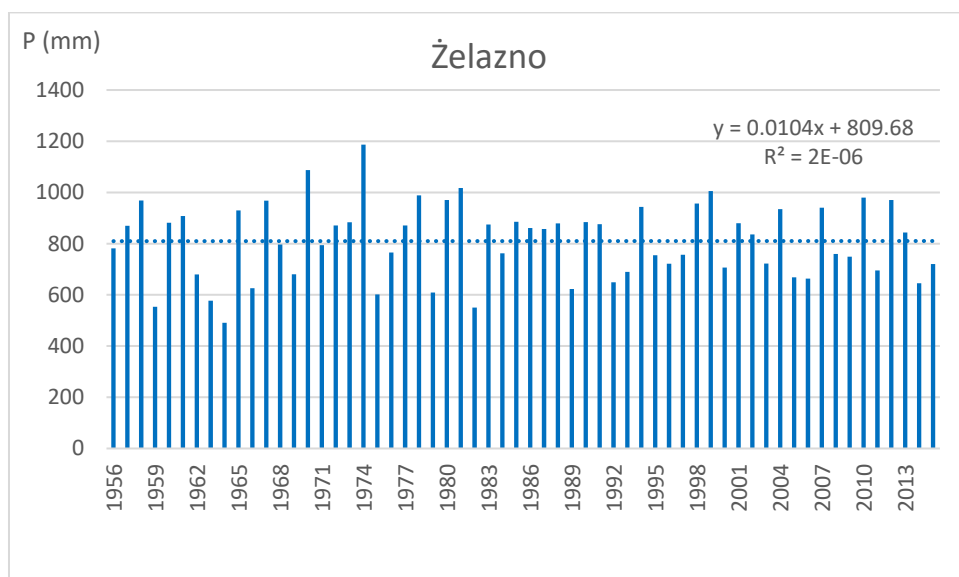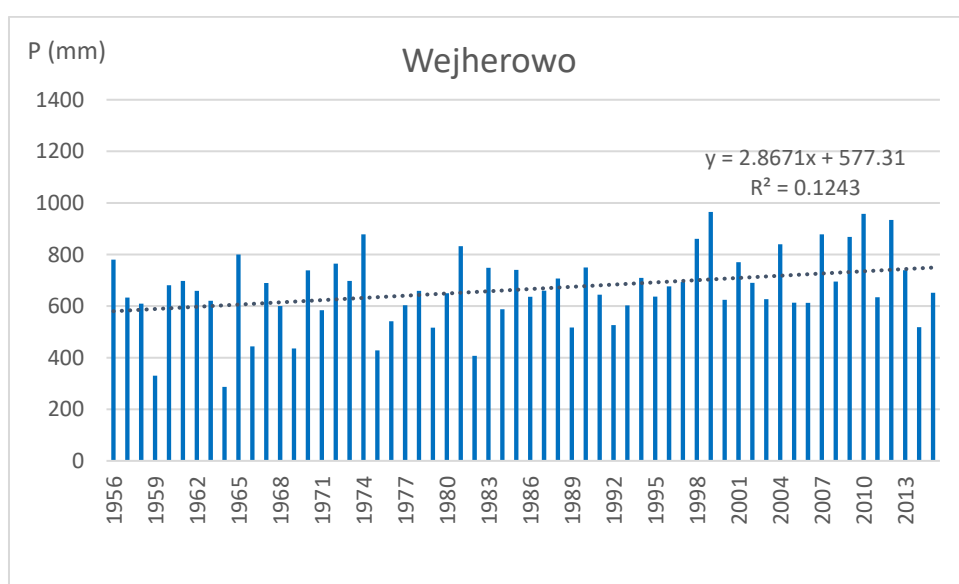

Figure S1. Annual sums of precipitation in the years 1956-2015

Supplement: s1 [file s1]
